# Supplementary material for: In situ preparation of hierarchical CuO@NiCo LDH core–shell nanosheet arrays on Cu foam for highly sensitive electrochemical glucose sensing
Source: Royal Society of Chemistry journal article supplement (doi:10.1039/d3nj04214f), 2023-01-01
Supplement: d3nj04214f1.pdf [file d3nj04214f1.pdf]

## **Electronic Supplementary Information**

### **In situ preparation of hierarchical CuO@NiCo LDH core-shell nanosheet arrays on Cu foam for highly sensitive electrochemical glucose sensing**

Ming Yuan<sup>a</sup>, Zhiyuan He<sup>a</sup>, Liwen Tan<sup>a</sup>, Zhangjue Liao<sup>a</sup>, Yujun Liu<sup>a</sup>, Yi Zhang<sup>b\*</sup>,  
Xiaoli Xiong<sup>a\*</sup>

<sup>a</sup>College of Chemistry and Materials Science, Sichuan Normal University, Chengdu  
610068, Sichuan, China

<sup>b</sup>Department of Chemical and Pharmaceutical, Sichuan Polytechnic Technician  
College, Chengdu 611130, Sichuan, China

\*E-mail: Zhangyi\_wenyue@163.com; xiongxiaoli2000@163.com

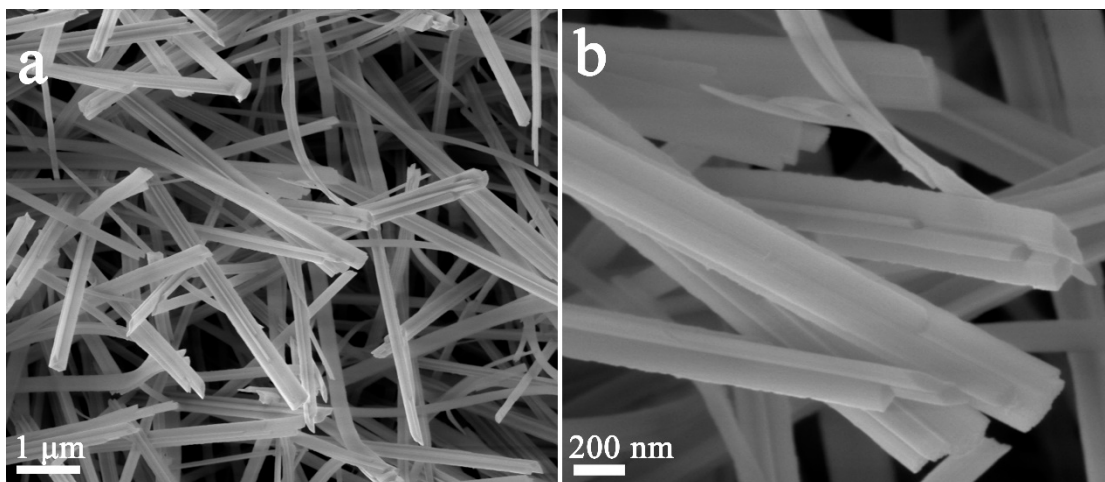

Fig.S1 The SEM image of Cu(OH)<sub>2</sub> NR/CF

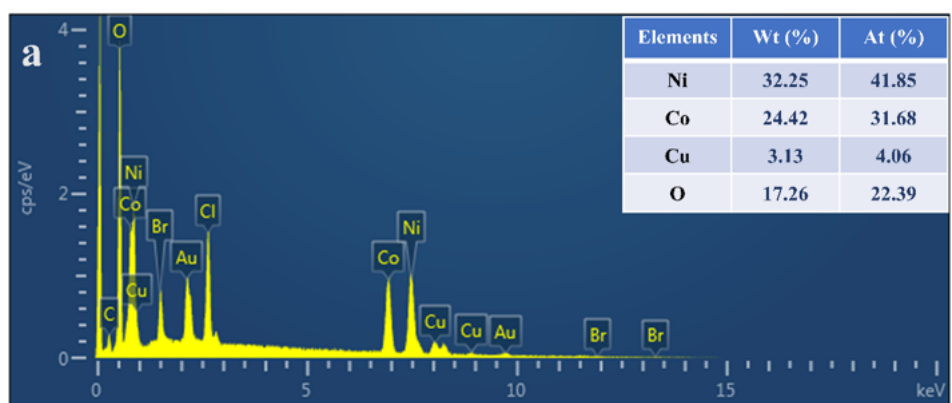

Fig. S2 EDX spectrum of CuO@NiCo LDH NSAs/CF.

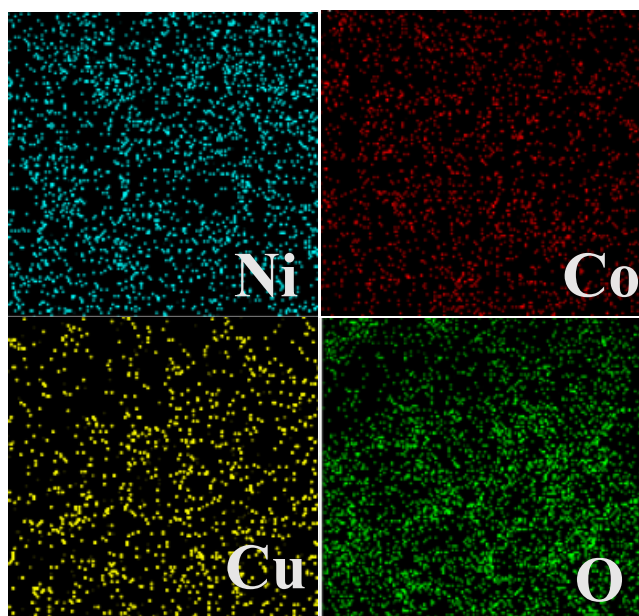

Fig. S3 Element mapping of CuO@NiCo LDH NSAs/CF.

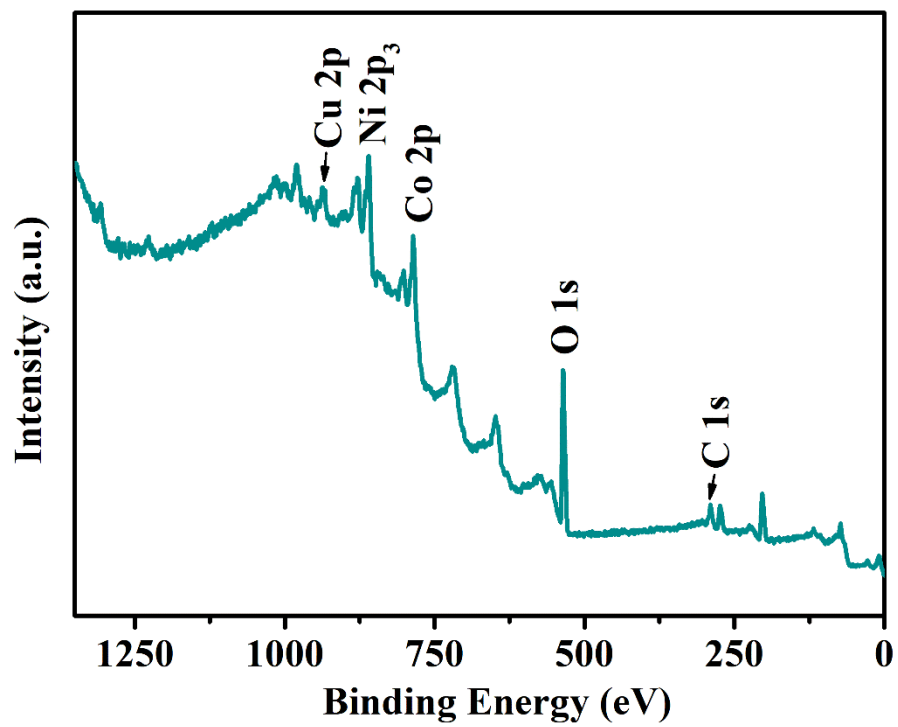

Fig. S4 XPS spectra of CuO@NiCo LDH NSAs/CF.

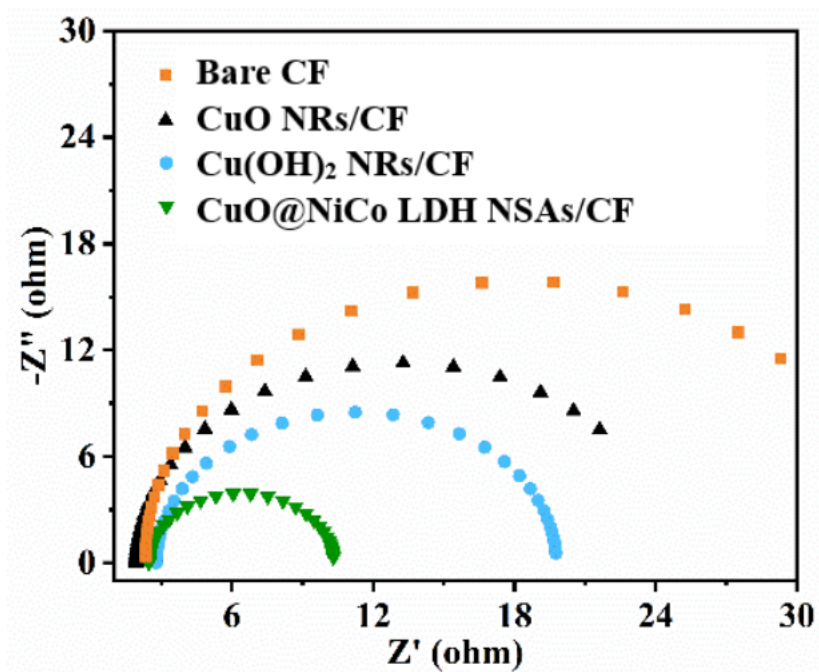

Fig. S5 Nyquist diagram of bare CF, Cu(OH)<sub>2</sub> NRs/CF, CuO NRs/CF and CuO@NiCo LDH NSAs/CF in 0.1 M NaOH dripping with 1 mM glucose.

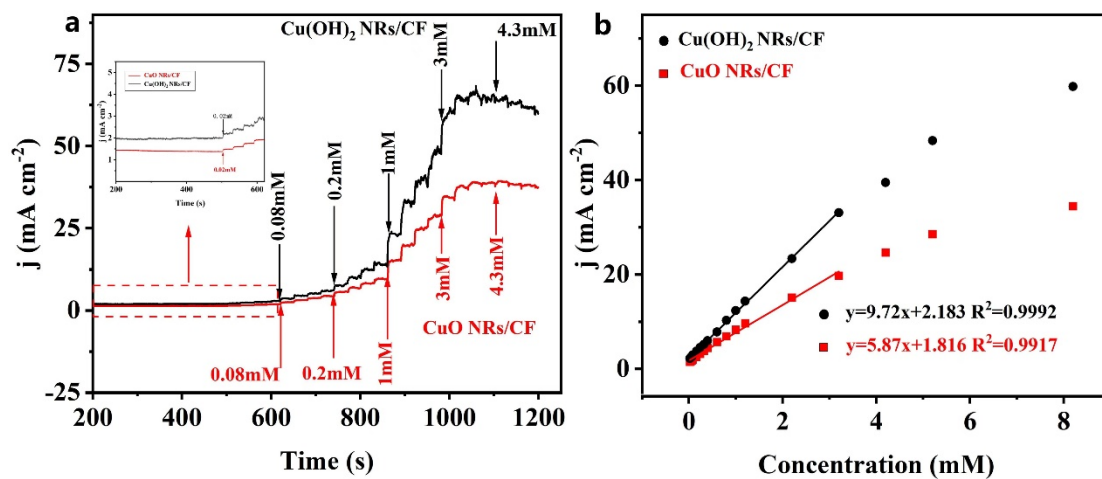

Fig. S6 (a) Amperometric responses of Cu(OH)<sub>2</sub> NRs/CF and CuO NRs/CF with successive additions of glucose to 0.1 M NaOH at 0.7 V. (b) Corresponding linear fitting relationship for Cu(OH)<sub>2</sub> NRs/CF and CuO NRs/CF electrodes.

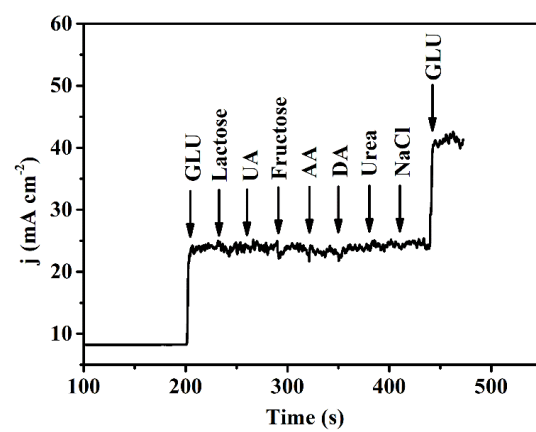

Fig. S7 I-t curves of CuO@NiCo LDH NSAs/CF under different interferences.

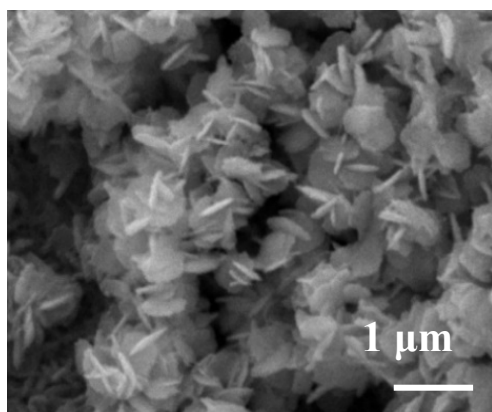

Fig. S8 The SEM image of the CuO@NiCo LDH NSAs electrode after stability test.

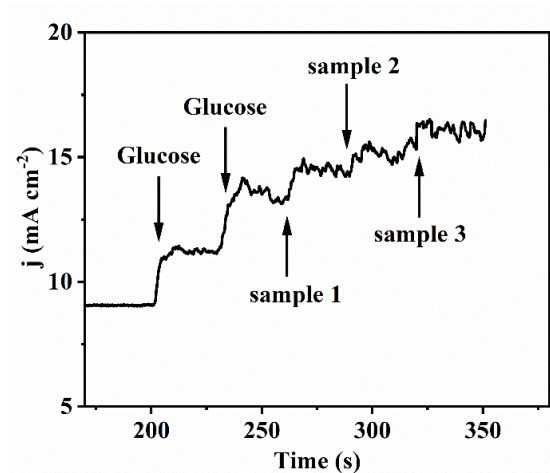

Fig.S9 The amperage current response of CuO@NiCo LDH NSAs/CF electrode to 20  $\mu$ M glucose and three different human serum samples successively added to 0.1 M NaOH solution at an applied potential of 0.7 V.
